# Supplementary material for: Droplet digital polymerase chain reaction (ddPCR) assays integrated with an internal control for quantification of bovine, porcine, chicken and turkey species in food and feed
Source: PubMed Central journal article supplement (PMC5552122; doi:10.1371/journal.pone.0182872), 2017-08-10
Supplement: pone.0182872.s001.pdf [file pone.0182872.s001.pdf]

S1 Table. Optimizing the internal control (IC) concentration in ddPCR assays

| IC concentration (fg/μl) + Bovine DNA (2.0 fg/μL) in a 1:4 ratio | Target copies/PCR | IC copies/PCR |
|------------------------------------------------------------------|-------------------|---------------|
| 60000                                                            | 1.6               | 194000        |
| 60000                                                            | 3.4               | 198000        |
| 6000                                                             | 100               | 46600         |
| 6000                                                             | 128               | 47120         |
| 600                                                              | 322               | 4600          |
| 600                                                              | 308               | 4540          |
| 60                                                               | 362               | 450           |
| 60                                                               | 444               | 444           |
| 6                                                                | 442               | 48            |
| 6                                                                | 420               | 58            |
| 0.60                                                             | 392               | 6.4           |
| 0.60                                                             | 324               | 4.6           |
| 0.06                                                             | 378               | 0             |
| 0.06                                                             | 394               | 1.6           |
