# Supplementary material for: Droplet digital polymerase chain reaction (ddPCR) assays integrated with an internal control for quantification of bovine, porcine, chicken and turkey species in food and feed
Source: PubMed Central journal article supplement (PMC5552122; doi:10.1371/journal.pone.0182872), 2017-08-10
Supplement: pone.0182872.s002.pdf [file pone.0182872.s002.pdf]

**S2 Table. Results of robustness study.** RSD (%) of ddPCR assays obtained from testing fortified cooked meat samples under different conditions in terms of DNA storage (fresh vs frozen at -20°C for 3 weeks), PCR reagent shelf life (fresh vs close to expiry date) and PCR machine age (new vs old)

| <b>Detection target</b>       | <b>RSD% of different ddPCR assays</b> |                       |                |
|-------------------------------|---------------------------------------|-----------------------|----------------|
|                               | <b>Bovine</b>                         | <b>Porcine</b>        | <b>Chicken</b> |
| <b>Range tested (% wt/wt)</b> | 0.05-3.0                              | 0.01-1.0              | 0.01-1.0       |
| <b>DNA storage</b>            | 6.7-22.6                              | 4.7-12.0              | 1.7-11.5       |
| <b>PCR reagent shelf life</b> | 5.6-13.3                              | 3.1-9.5               | 1.7-11.5       |
| <b>PCR machine age</b>        | 2.0-13.3                              | 1.5-14.9 <sup>a</sup> | 2.9-13.1       |

<sup>a</sup>There was one outlier with RSD of 59% at 0.05%. It is expected that it was due to heterogeneous nature of the sample.
